# Supplementary material for: Can action research strengthen district health management and improve health workforce performance? A research protocol
Source: PubMed Central journal article supplement — BMJ Open. 2013 Aug 29;3(8):e003625. doi: 10.1136/bmjopen-2013-003625 (PMC3758965; doi:10.1136/bmjopen-2013-003625), 2013-08-29
Supplement: bmjopen-2013-003625.draft_revisions.pdf [file bmjopen-2013-003625.draft_revisions.pdf]

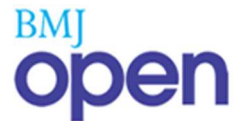

**Can action research strengthen district health management  
and improve health workforce performance? A research  
protocol**

|                                 |                                                                                                                                                                                                                                                                                                                                                                                                                                                                                                                                                                                                                                                                                                                                                                                                                                                                                                                                                                                                                                                                            |
|---------------------------------|----------------------------------------------------------------------------------------------------------------------------------------------------------------------------------------------------------------------------------------------------------------------------------------------------------------------------------------------------------------------------------------------------------------------------------------------------------------------------------------------------------------------------------------------------------------------------------------------------------------------------------------------------------------------------------------------------------------------------------------------------------------------------------------------------------------------------------------------------------------------------------------------------------------------------------------------------------------------------------------------------------------------------------------------------------------------------|
| Journal:                        | <i>BMJ Open</i>                                                                                                                                                                                                                                                                                                                                                                                                                                                                                                                                                                                                                                                                                                                                                                                                                                                                                                                                                                                                                                                            |
| Manuscript ID:                  | bmjopen-2013-003625                                                                                                                                                                                                                                                                                                                                                                                                                                                                                                                                                                                                                                                                                                                                                                                                                                                                                                                                                                                                                                                        |
| Article Type:                   | Protocol                                                                                                                                                                                                                                                                                                                                                                                                                                                                                                                                                                                                                                                                                                                                                                                                                                                                                                                                                                                                                                                                   |
| Date Submitted by the Author:   | 19-Jul-2013                                                                                                                                                                                                                                                                                                                                                                                                                                                                                                                                                                                                                                                                                                                                                                                                                                                                                                                                                                                                                                                                |
| Complete List of Authors:       | Mshelia, Comfort; University of Leeds, Nuffield Centre for International Health and Management<br>Huss, Reinhard; University of Leeds, Nuffield Centre for International Health and Development<br>Mirzoev, Tolib; University of Leeds, Nuffield Centre for International Health and Development<br>Elsey, Helen; University of Leeds, Nuffield Centre for International Health and Development<br>Baine, Sebastian; Makerere University, School of Public Health<br>Aikins, Moses; University of Ghana, School of Public Health<br>Kamuzora, Peter; University of Dar Es Salaam, Institute of Development Studies<br>Bosch-Capblanch, Xavier; University of Basel, Swiss Tropical and Public Health Institute<br>Raven, Joanna; Liverpool School of Tropical Medicine, International Public Health<br>Wyss, Kaspar; University of Basel, Swiss Tropical and Public Health Institute<br>Green, Andrew; University of Leeds, Nuffield Centre for International Health and Development<br>Martineau, Tim; Liverpool School of Tropical Medicine, International Public Health |
| <b>Primary Subject Heading</b>: | Global health                                                                                                                                                                                                                                                                                                                                                                                                                                                                                                                                                                                                                                                                                                                                                                                                                                                                                                                                                                                                                                                              |
| Secondary Subject Heading:      | Health services research, Research methods                                                                                                                                                                                                                                                                                                                                                                                                                                                                                                                                                                                                                                                                                                                                                                                                                                                                                                                                                                                                                                 |
| Keywords:                       | Human resource management < HEALTH SERVICES ADMINISTRATION & MANAGEMENT, International health services < HEALTH SERVICES ADMINISTRATION & MANAGEMENT, Health policy < HEALTH SERVICES ADMINISTRATION & MANAGEMENT                                                                                                                                                                                                                                                                                                                                                                                                                                                                                                                                                                                                                                                                                                                                                                                                                                                          |
|                                 |                                                                                                                                                                                                                                                                                                                                                                                                                                                                                                                                                                                                                                                                                                                                                                                                                                                                                                                                                                                                                                                                            |

## Can action research strengthen district health management and improve health workforce performance? A research protocol.

C. Mshelia<sup>\*1</sup>, R. Huss, T<sup>1</sup>. Mirzoev, H<sup>1</sup>. Elsey, S.O<sup>1</sup>. Baine, M<sup>2</sup>. Aikins, P<sup>3</sup>. Kamuzora, X<sup>4</sup>. Bosch-Capblanch<sup>5</sup>, J. Raven, K<sup>1</sup>. Wyss<sup>6</sup>, A. Green, T<sup>1</sup>. Martineau<sup>6</sup>

---

### Affiliations:

1. University of Leeds, Nuffield Centre for International Health and Management  
Leeds, United Kingdom
2. Makerere University, School of Public Health  
Kampala, Uganda
3. University of Ghana, School of Public Health  
Legon, Ghana
4. University of Dar Es Salaam, Institute of Development Studies
5. University of Basel, Swiss Tropical and Public Health Institute  
Basel, Switzerland
6. Liverpool School of Tropical Medicine, International Public Health  
Liverpool, United Kingdom

**Keywords:** Human resource management < HEALTH SERVICES ADMINISTRATION & MANAGEMENT, International health services < HEALTH SERVICES ADMINISTRATION & MANAGEMENT, Health policy < HEALTH SERVICES ADMINISTRATION & MANAGEMENT

Word Count: 5923

Reference Count: 23

\*Corresponding author

## Abstract

### Introduction

The single biggest barrier for countries in sub-Saharan Africa (SSA) to scale up the necessary health services for addressing the three health-related Millennium Development Goals and achieving Universal Health Coverage is the lack of an adequate and well-performing health workforce. This deficit needs to be addressed both by training more new health personnel *and* by improving the performance of the existing and future health workforce. However, efforts have mostly focused on training new staff and less on improving the performance of the existing health workforce. The purpose of this paper is to disseminate the protocol for the PERFORM project and reflect on key challenges encountered during the development of this methodology and how they are being overcome.

### Methods

The overall aim of the PERFORM project is to identify ways of strengthening district management in order to address health workforce inadequacies by improving health workforce performance in sub-Saharan Africa. The study will take place in three districts each in Ghana, Tanzania and Uganda using an action research approach. The district health management teams (DHMTs), will lead on planning, implementation, observation, reflection and redefinition of the activities in the study, with the support of the country research teams (CRTs). Taking into account national and local human resource (HR) and health systems (HS) policies and practices already in place, 'bundles' of HR/HS strategies that are feasible within the context and affordable within the districts' budget will be developed by the DHMTs to strengthen priority areas of health workforce performance. A comparative analysis of the findings from the three districts in each country will add new knowledge on the effects of these HR/HS bundles on DHMT management and workforce performance and the impact of an action research approach on improving the effectiveness of the DHMTs in implementing these interventions.

### Discussion

Different challenges were faced during the development of the methodology. These include the changing context in the study districts, competing with other projects and duties for the time of district managers, complexity of the study design, maintaining anonymity and confidentiality of study participants as well as how to record the processes during the study.

1  
2  
3 We also discuss how these challenges are being addressed. The dissemination of this  
4 research protocol is intended to generate interest in the PERFORM project and also  
5 stimulate discussion on the use of action research in complex studies such as this on  
6 strengthening district health management to improve health workforce performance.  
7  
8  
9

### 10 11 12 **Keywords**

13  
14 Human resources, action research, health worker performance, management strengthening,  
15 district health management team, leadership, Ghana, Tanzania, Uganda.  
16  
17  
18  
19  
20  
21  
22  
23  
24  
25  
26  
27  
28  
29  
30  
31  
32  
33  
34  
35  
36  
37  
38  
39  
40  
41  
42  
43  
44  
45  
46  
47  
48  
49  
50  
51  
52  
53  
54  
55  
56  
57  
58  
59  
60

## Article Summary

### Article focus

- There is a need for more research into how best to improve the performance of the existing health workforce in sub-Saharan Africa. However, the complexity of health systems and wider environments requires an understanding of how health worker performance can be improved in the real and complex world facing health managers and decision makers in sub-Saharan Africa.
- The dissemination of this research protocol is intended to generate interest in the PERFORM project and, more importantly, stimulate discussion on the use of action research to improve health workforce performance within complex health systems in low and middle income countries.

### Key messages

- Using action research to design and evaluate the effects of interventions to strengthen district health management and improve health workforce performance should encourage ownership of the results by the district health managers and ensure the sustainability of the interventions even after the project has ended.
- Key challenges faced during the development of the methodology are: the changing context in the study districts, competing with other projects and duties for the time of district managers, complexity of the study design, maintaining anonymity and confidentiality of study participants as well as how to record the processes during the study.

### Strengths and limitations of this study

- Comparing the intervention effects across the nine unique study sites is likely to be methodologically complex. While this is a strength of the study, this requires a combination of different methodological expertise.
- This study will generate new knowledge on 'what HR/HS interventions work best for whom and in which contexts' and how district health managers can be supported to do their work better.

## Introduction

The single biggest barrier for countries in sub-Saharan Africa (SSA) to scale up the necessary health services for addressing the health-related Millennium Development Goals and achieving Universal Health Coverage is the lack of an adequate and well-performing health workforce[1, 2] . This deficit in health workforce capacity needs to be addressed both by training more new health personnel *and* by improving the performance of the existing and future health workforce. However, simply increasing the number of health workers or improving workforce performance will not necessarily result in the improvement of health related processes and outcomes unless the organisational context provides an enabling environment to carry out the health care activities.

Much emphasis in research and development has been placed on training more new health personnel [3, 4] and less on strategies for improving workforce performance [5]. WHO describes the dimensions of a well-performing workforce as availability, competence, responsiveness and productivity [6]. Vujicic and Ohiri add quality of care and highlight the importance of absenteeism as a determinant of availability [7]. We understand performance management as the process of creating a work environment or setting in which people are enabled to perform to the best of their abilities. While HR management is understood as the process of facilitating and improving the performance of the collaborators by building a conducive work environment and providing maximum opportunities to the collaborators for participating in organizational planning and decision making process. We are specifically interested in the interactions of these processes with the broader health systems functioning.

In 2007 WHO introduced the model of six inter-dependent health systems building blocks including human resources and the need for integrated strategic responses to challenges [8]. De Savigny and Adams further developed the concept of health systems thinking in health systems strengthening[9] and more recently the concept of complex adaptive systems has been described to highlight the complex nature of health systems [10, 11]. Projects with complex social interventions can adopt a realist approach: *‘what works for whom, in what circumstances, in what respects, and how?’* (p. V) [12]and recognise that *‘every intervention, from the simplest to the most complex, has an effect on the overall*

1  
2  
3 *system, and the overall system has an effect on every intervention.*' (p. 19) [9]. The concept  
4 of systems thinking is also found in the mainstream human resource (HR) management  
5 literature which recognises the complex interactions between different HR management  
6 strategies, the methods of implementation and the wider health system (HS) context[13,  
7 14]. For example, the pay-for-performance of health workers in maternity care may be  
8 combined with learner-directed training, changes in processes (e.g. consultation), supplies  
9 (e.g. medicines), equipment (e.g. laboratory) and infrastructure (e.g. facilities). Therefore  
10 an integrated set, or a 'bundle', of HR and HS strategies can address complex areas such as  
11 improved workforce performance [15-17] . A pay-for-performance initiative in one area may  
12 also lead to unintended effects such as the neglect of other service delivery areas, because  
13 health personnel are distracted from their essential duties.  
14  
15  
16  
17  
18  
19  
20  
21  
22

23 The ability to adopt a systems approach – combining an integrated set of HR and  
24 complementary HS strategies with the aim to achieve synergies and avoid negative  
25 unintended consequences – is only possible if managers have adequate room for  
26 manoeuvre, of what Bossert refers to as 'decision space' [18]. The increasing HS  
27 decentralisation of planning and management authority to lower levels, and in particular, to  
28 districts in SSA can make this space available to managers.  
29  
30  
31  
32  
33

34 Local health managers need to learn how to effectively use available decision space.  
35 Because of the complexity of all the influences, including resource constraints, to be  
36 considered, this may be best learned through Action Research (AR) on the job [19] as a form  
37 of management development.  
38  
39  
40  
41

42 The PERFORM project, funded by the European Commission FP7 Framework, aims to  
43 enhance our understanding of how health workforce performance at the district level in  
44 three African countries can be improved and how AR as an approach can strengthen health  
45 management capacity. We are further interested in the relations between improved HR  
46 performance and its interactions with HS performance.  
47  
48  
49  
50

### 51 **Action Research in PERFORM**

52

53 AR has been defined as 'an enquiry which is conducted by a group on a problem which is of  
54 interest to them. Its aim is two- fold; to improve practice and to generate knowledge about  
55 the processes and strategies that work best to create that improvement'[20, 21].  
56  
57  
58  
59  
60

1  
2  
3 Lewin [22] is often credited with first describing the action research cycle. The cycle has  
4 further been described as a spiral or similar to an intertwined Russian wedding ring[23] as  
5 the complexity of the cycles of intervention and evaluation deepens.  
6  
7

8  
9 In contrast to a top-down research approach where project design and implementation are  
10 directed by outsiders, in AR studies, the people who are closest to the problem ,in this case  
11 the district health management teams (DHMTs ), will lead on planning, implementation,  
12 observation, reflection and the redefinition of the activities in the study. The country  
13 research teams (CRTs) will support the DHMTs and can ask for peer advice from the paired  
14 European partner (EP). The DHMTs will continuously work through systematic cycles of  
15 planning, acting, observing and reflecting to:  
16  
17  
18  
19  
20

- 21 - Describe and analyse the initial and changing HR and HS situation they face (e.g.  
22 analysing the evidence available to them)
- 23 - Identify and plan strategies to improve the situation or problem (e.g. using literature  
24 to select interventions they can implement within their budget)
- 25 - Implement the changes needed (e.g. through decisions taken during DHMT  
26 meetings)
- 27 - Observe and record the effects (e.g. through monitoring and evaluation)
- 28 - Explain and reflect on the process and effects of changes made (e.g. discuss  
29 identified outcomes during DHMT meetings)
- 30  
31  
32  
33  
34  
35  
36  
37

38 The purpose of this paper is to disseminate the methodology for the PERFORM project  
39 and reflect on key challenges encountered during the development of this methodology  
40 and how they are being overcome. We start by outlining the project aim and objectives.  
41 We proceed to describe the project setting and partners and then outline the research  
42 design and conclude with reflection on lessons learned from this experience.  
43  
44  
45  
46

## 47 **Methods**

### 48 **Project Aim and objectives**

49  
50 The aim of the PERFORM project is therefore to identify ways of strengthening  
51 decentralised management to address health workforce inadequacies by improving health  
52 workforce performance in sub-Saharan Africa. It seeks to answer the following key  
53 questions: how effective is AR for management strengthening in the context of  
54  
55  
56  
57  
58  
59  
60



1  
2  
3 decentralised managerial authority? And, what bundles of HR/HS strategies help improve  
4 workforce performance, for whom and in what contexts?  
5  
6

7 In addition to developing new knowledge, the specific research objectives are:  
8

- 9 1. To support health managers to carry out a situation analysis on the health  
10 workforce, with a particular focus on performance, in the study districts.  
11
- 12 2. To develop and test context-specific management strengthening processes, focused  
13 on improving workforce performance, which will:
  - 14 a. Identify areas of health workforce performance to be improved
  - 15 b. Implementing integrated HR and HS strategies feasible within the existing  
16 context, to improve health workforce performance
  - 17 c. Monitor the implementation of strategies and evaluate the intermediate  
18 processes and impact on health workforce performance, and the wider  
19 health system.
- 20 3. To conduct comparative analyses across districts and countries of:
  - 21 a. The management strengthening intervention to support improved workforce  
22 performance, and
  - 23 b. Processes of implementing the integrated HR and HS strategies and intended  
24 and unintended effects on health workforce performance and the wider  
25 health system.
- 26 4. To provide on-going communication of the research process, findings and  
27 conclusions, as well as improve the research capacity of partners on integrated  
28 approaches to workforce performance improvement and contribute to  
29 strengthening capacities of decentralised management of district health systems.  
30  
31  
32  
33  
34  
35  
36  
37  
38  
39  
40  
41  
42  
43  
44  
45

#### 46 **Project Setting**

47  
48 The project will work at the district level in Ghana, Tanzania and Uganda. These three  
49 countries were selected because they have decentralised health systems where managers  
50 have adequate potential 'decision space' [18] to address the problems of poor performance  
51 of the health workforce.  
52  
53  
54  
55  
56  
57  
58  
59  
60

Three districts in each country have been selected for this study, using two broad pre-defined criteria. First, because of the collaborative nature of the project, it was important to have a motivated and reasonably staffed DHMT with which to work. A second criterion was the inclusion of different district contexts including a mix of rural and urban as well as those with good and poor overall performance. Because this is not an experimental study, no control districts were selected. However, information about wider contextual changes to inform the impact assessment of the interventions will be captured.

### Partners

Six partner institutions make up the PERFORM consortium- three are based in Africa and three in Europe. Each partner from an African country (also referred to as Country Research Teams, CRTs) is paired with a European Partner (EP) (Table 1).

**Table 1: Paired Partners**

| African research partner                                                | European Paired partner                                                                    |
|-------------------------------------------------------------------------|--------------------------------------------------------------------------------------------|
| School of Public Health, University of Ghana                            | Swiss Tropical and Public Health Institute, Switzerland                                    |
| Institute of Development Studies, University of Dar Es Salaam, Tanzania | Nuffield Centre for International Health and Development, Leeds University, United Kingdom |
| School of Public Health, Makerere University, Uganda                    | Liverpool School of Tropical Medicine, United Kingdom                                      |

The District Health Management teams, DHMTs, are regarded as being co-researchers in the project; rather than have the research done **to** them, the research is done **with** and **by** them. They will be involved in collecting and analyzing data throughout the project as well as leading and participating in each phase of the AR cycle.

The CRTs will act as facilitators, supporting the DHMTs in identifying appropriate research tools and analysis methods, problem analysis and strategy development as well as facilitating reflection among the DHMTs on how to maximise the effectiveness of the interventions. Specific capabilities and strengths will differ from one DHMT to another and so ultimately, there will be room for negotiation of roles between the DHMTs and the CRTs.

The EPs as part of the paired partnership will provide support and offer research advice to their African pairs and are also expected to attend all national workshops held by their

1  
2  
3 paired African partner. The University of Leeds is offering a methodology help desk to all  
4 partners during the implementation phase.  
5  
6

7 PERFORM has brought together DHMTs and researchers from Africa and researchers from  
8 Europe, in a unique opportunity to transfer knowledge and skills in both directions and to  
9 document a reflection-action process which will be hopefully embedded in the routine  
10 management practices at district level. PERFORM provides opportunities for inter-country  
11 collaboration and learning.  
12  
13  
14  
15

### 16 17 18 **Research Design** 19

20 This project will use action research to enhance understanding of how and under what  
21 conditions, strengthening district health management can improve health workforce  
22 performance. A systems approach using an integrated set of HR and other HS strategies  
23 that are feasible within the context and affordable within the DHMTs budget will be used by  
24 district level managers through an AR approach (see Figure 2) to strengthen district  
25 management in order to improve health workforce performance.  
26  
27  
28  
29  
30

31 Through the AR cycles, the DHMTs with the assistance of the CRTs, will evaluate the success  
32 of these HR/HS bundles to improve district workforce performance. The DHMTs, CRTs and  
33 EPs will reflect continually throughout the project and compare baseline and end line data  
34 to assess the effectiveness of the use of AR in strengthening district management processes.  
35  
36  
37  
38  
39

### 40 41 **Project timeline** 42

43 The project commenced in September 2011 and will last a total of 48 months as shown in  
44 figure 3. It is split into three phases.  
45  
46

47 *Phase one* involves project start- up, district selection and methodology development.

48 During phase one, study districts will be selected in each country and the research  
49 methodology developed and finalised in collaboration with local and national stakeholders.  
50 The methodology will include agreements on the indicators for which data will be collected  
51 and the development of specific data collection tools, for subsequent adaptation in each  
52 country. The methodology will be updated periodically as the project progresses, based on  
53 need and the reflections of the PERFORM research team.  
54  
55  
56  
57  
58  
59  
60

1  
2  
3 *Phase two* is the implementation phase of the project and will last about twenty four  
4 months. During the first nine months of this period, each DHMT will be supported to  
5 undertake a situation analysis of the state of health workforce in their district, the DHMT  
6 management capacity including their decision-making space as well as the wider health  
7 system and the contextual environment. The findings of the situation analysis will be  
8 reviewed during National workshop 1 involving members of each DHMT, relevant  
9 stakeholders such as members of the regional health management team and supported by  
10 the respective CRT and EP. At consortium workshop 2 CRTs and EPs will discuss the findings  
11 of the situation analyses and possible HR/HS bundles to address the problem areas in each  
12 district explored. Following this workshop and supported by the CRTs, the DHMTs in each  
13 district will go on to select relevant HR/HS bundles to address their respective problems.  
14 Each DHMT will have the freedom to choose which problems they chose to address. This is  
15 primarily to foster ownership for the process and the results. Each DHMT will be  
16 encouraged to integrate a plan for implementation and monitoring the effects of the  
17 bundles into their annual district health plans; this includes identification of what data to  
18 collect as well as the methods, and timing, for the data collection.

19  
20  
21  
22  
23  
24  
25  
26  
27  
28  
29  
30  
31  
32 The selected HR/HS bundles will be implemented in each district by the DHMT. Using the AR  
33 cycles, the effects of the actions of the DHMTs will be observed and reflected on by the  
34 DHMTs. In light of this, elements of the HR/HS bundles may change or new ones added  
35 during the implementation period. At consortium workshop 3, CRTs and EPs will review  
36 progress of the HR/HS bundles in each district and plan for comparative analysis. The effects  
37 of the HR/HS bundles on health workforce and service delivery indicators will be evaluated  
38 in each district. At the end of this phase the DHMTs will undertake another situation analysis  
39 which will form part of the evaluation of the HR/HS bundles and will serve as a comparison  
40 with the baseline dataset from the initial situational analysis. Following this, the DHMTs and  
41 CRTs will meet at National workshop 3 to discuss and share the findings across the three  
42 districts.

43  
44  
45  
46  
47  
48  
49  
50  
51  
52 The main focus of *phase three* is the intra- and inter-country comparative analysis of the  
53 extent to which, and under what conditions the implemented interventions work well for  
54 strengthening management skills of DHMTs and improving health workforce performance.  
55 Furthermore, the content of strategies and their intended and unintended effects will be  
56  
57  
58  
59  
60

1  
2  
3 explored – both on workforce performance and the wider HS. At consortium workshop four  
4 all partners will meet to review the preliminary findings from the comparative analysis.  
5  
6 Following this meeting a small amount of additional data may be collected. Then the  
7  
8 analysis will be completed and results compiled into a research report.  
9  
10  
11  
12  
13  
14  
15  
16  
17  
18  
19  
20  
21  
22  
23  
24  
25  
26  
27  
28  
29  
30  
31  
32  
33  
34  
35  
36  
37  
38  
39  
40  
41  
42  
43  
44  
45  
46  
47  
48  
49  
50  
51  
52  
53  
54  
55  
56  
57  
58  
59  
60

For peer review only

## Data collection

Quantitative and qualitative data collection methods will be used during the project. Each DHMT can choose which methods they use depending on the action being assessed within the AR cycle. Several data sources have been identified:

- Routine data from Health Management Information Systems
- A district questionnaire developed specifically for this project
- Key informant interviews and focus group discussions
- Observation of management processes
- Document review of official reports and minutes of meetings

Where possible, routine data will be used to assess the effectiveness of the strategies with the aim being to support DHMTs in the use of routinely available data to inform their planning and decision making. This is seen as a more sustainable approach to strengthening the management capacity of DHMT. Data collection tools have been adapted to suit the context and needs in each country. The processes and learning from observations are being recorded by DHMTs in learning histories with reflection supported by the CRTs.

The CRTs will provide research advice to the DHMTs during data collection and also take part in collecting and analysing data where necessary.

*Situation analysis:* The purpose of the initial situation analysis is to serve as the baseline for the project as well as inform the subsequent AR cycles in each district. It is being carried out in a two step process:

- The first step is common to all study sites: data on basic information on the health workforce, DHMT, HS and local and national context will be collected. This information will be used by the CRTs to prepare a report for the before/after comparative analysis in and between all districts.
- The second step is specific for each study site and will focus on particular issues or problems emerging in step 1, for example, lack of training opportunities. These will become part of the first Action Research (AR) cycle in the district. A toolkit of data collection methods is available for the DHMTs to use in consultation with the CRTs, and

1  
2  
3 adapt to the district context, and includes: key informant interviews, focus group  
4 discussions, surveys, observations of management processes and document reviews.  
5  
6 CRTs are providing advice on research strategies.  
7

8  
9 *Action research cycles:* In the observation and reflection parts of the action research cycle,  
10 data will be collected to record the implementation process, the observed effects of the  
11 implemented changes and the reflection and learning which are taking place. The DHMTs,  
12 with support from the CRTs, are selecting the methods to collect this data.  
13  
14

15  
16 *Final situation analysis:* This will take place after the implementation of the HR/HS bundles  
17 is complete. The data collected will be the same as that collected during the initial situation  
18 analysis.  
19  
20

21  
22 *Evaluation of intervention effects:* In order to evaluate the effectiveness of the selected  
23 HR/HS bundles as well as their effects, it is necessary to collect data on outputs relevant to  
24 the intervention and analyse this data. It is planned that this will take place on an on-going  
25 basis as part of the action research cycle. The data collection method to be used for this will  
26 be decided by the DHMTs and CRTs.  
27  
28  
29

30  
31 *Evaluation of DHMT strengthening process:* In order to evaluate the effectiveness of the  
32 DHMT strengthening process, it is necessary to have the above information on the bundles,  
33 analyse the learning histories in each district, organise a focus group and individual  
34 interviews with DHMT members.  
35  
36  
37

### 38 **Data Analysis**

39  
40 Several analyses will be undertaken:  
41

- 42 1) Situational analysis before and after the implementation of HR/HS bundles aimed at  
43 capturing baseline information on key indicators in the districts.  
44
- 45 2) Comparative analyses focused on measuring and recording the differences over time  
46 and between geographical regions as the project progresses.  
47
- 48 3) On-going analysis of the effects of implemented HR/HS bundles.  
49  
50  
51

52  
53 Generic indicators and measurements will be used to describe each study site. The choice of  
54 indicators and outcomes on selected problem areas is made by the DHMTs with agreement  
55 and support from the CRTs and EPs. The analysis of the data obtained during the project  
56 follows the action research approach. This means that while conventional qualitative and  
57  
58  
59  
60

1  
2  
3 quantitative analysis methods are used, the process of the analysis aims to be participatory;  
4 with DHMTs discussing and reflecting on how to analyse quantitative data and the  
5 interpretations of qualitative data.  
6  
7  
8  
9

## 10 **Ethics**

11  
12  
13 The study protocol was approved by the appropriate Institutional Review Boards in Ghana,  
14 Tanzania and Uganda. In addition, ethics approval was also obtained from the Institutional  
15 Review Boards of the Liverpool School of Tropical Medicine (project co-ordinators) and the  
16 University of Leeds (project methodology lead).  
17  
18  
19

20  
21 All questionnaires and interview transcripts will be coded in order to protect the  
22 confidentiality of participants. No names or other identifying information of participants will  
23 be used in any results in order to ensure their anonymity.  
24  
25

26 All data collection tools such as the district questionnaire will be developed in English.  
27  
28 Where English is not the official language such as Tanzania, data collection tools will be  
29 translated by approved translators.  
30  
31

32 All participants receive the project information sheet prior to being approached for written  
33 consent to participate in the project. Participants have the right to withdraw consent at any  
34 point during the project. All DHMTs have agreed to their participation as co-researchers and  
35 informants through a Memorandum of Understanding which was signed by the director of  
36 the DHMTs and the leader of the CRTs.  
37  
38  
39  
40

## 41 **Discussion**

42  
43 Having summarised the research protocol, we now reflect on the key challenges  
44 encountered during the methodology development and discuss these alongside the lessons  
45 learned for future similar studies.  
46  
47  
48

49 During the development of the methodology, the consortium partners reflected on the  
50 application of the design and methods through face to face meetings, on-line discussions, e-  
51 mail exchanges and workshops. These iterative reflections helped the team to adapt the  
52 methodology to the context of the three countries. The key lessons from this reflection  
53 include five broad issues.  
54  
55  
56  
57  
58  
59  
60



- 1  
2  
3 1. *The contexts in which we are working are constantly changing; each district has different*  
4 *starting points and preferences for the issues they would like to address in their district.*

5 Hence the researchers are faced with the challenge of as it were, trying to 'jump on a  
6 moving train'. Changes to key DHMT members such as the District Medical Officer due  
7 to transfers or study leave make it difficult to collaborate and plan ahead. Turnover of  
8 DHMT members means that new relationships have to be established and it can take  
9 time for new members of staff to buy in to the reflective action research process,  
10 though most DHMTs have around ten members so in most cases a critical mass will  
11 remain. The way out of this dilemma for the researchers has been to adopt a flexible  
12 approach regarding agreements and accommodate to DHMTs' constraints and priorities.  
13 While this approach may constrain the attainment of project objectives (given the  
14 limited time we have), we believe it is essential for fostering ownership and participation  
15 from the DHMTs.

- 16  
17  
18  
19  
20  
21  
22  
23  
24  
25  
26 2. *Action research requires continuous substantial time inputs and strong commitment*  
27 *from all involved parties.* DHMTs face multiple priorities and are faced with substantial  
28 number of requests from internal and external bodies. For example, on a few occasions  
29 DHMTs have been called away to attend other meetings and workshops during a  
30 scheduled PERFORM workshop. This, coupled with the changing context described  
31 previously has created a challenge in time management for the DHMTs. This means that  
32 in order to achieve project goals and encourage continuity with the gains from the  
33 project, DHMTs need to integrate the project tasks within their routine work and duties.  
34 Each DHMT is integrating their selected HR/HS bundles into their annual health plans.  
35 Also, the DHMTs have made a commitment to include the PERFORM project to the  
36 agenda for their routine meetings. This is likely to be challenging initially, as DHMTs  
37 adapt to a different way of doing things. However, in the long term, this may result in  
38 more efficient use of their time and other resources.

- 39  
40  
41  
42  
43  
44  
45  
46  
47  
48  
49 3. *Developing the methodology for comparing what in essence are nine unique action*  
50 *research studies in a meaningful way has presented a challenge.* Because it is not  
51 possible to know in advance which interventions each district will choose to implement,  
52 it is impossible to pre-determine which outcomes will be measured and therefore  
53 compared across districts and countries. Our solution to this has been to compare the  
54 process of planning and implementing the interventions in each study district as well as  
55  
56  
57  
58  
59  
60

1  
2  
3 comparing the extent to which each intervention achieves the desired effects. We plan  
4 to also compare how the effects of the interventions change DHMT management and  
5 health HR performance in the district.  
6  
7

- 8  
9 4. *The researchers have learnt that dealing with ethical issues such as maintaining*  
10 *confidentiality and anonymity of participants is not straightforward.* The difficulty stems  
11 from the fact that the DHMTs are co-researchers in this action research based study,  
12 leading to two challenges. Firstly, they are expected to also take part in data collection  
13 and analysis. This presents a dilemma where participants such as health facility staff or  
14 other local stakeholders express a view which portrays the DHMT, either as a group or  
15 individually, in less than favourable terms. In order to protect the confidentiality and  
16 anonymity of participants, the research team has adopted strict guidelines on obtaining,  
17 storing and referencing personal information to be adhered to by all researchers on the  
18 project, thus ensuring that only the necessary researchers have the ability to match the  
19 names of individuals to their responses. Secondly, it is likely that DHMTs will find out  
20 about difficulties in the other study districts in their country during joint meetings and  
21 workshops. The research team agreed to anonymize information and data as much  
22 possible and remind each DHMT of their duties as researchers to keep certain  
23 information confidential and not share it outside the research group.  
24  
25

26 The PERFORM project will work towards introducing new ways of working in order to  
27 challenge and improve hierarchical health systems where gender and power interplay.  
28  
29

- 30  
31 5. *Recording the processes and outcomes during the project is essential in order to facilitate*  
32 *learning.* Deciding how records are kept (i.e. learning histories, journals or reflective  
33 logs, written or oral recordings) and who is responsible for keeping these records (i.e.  
34 CRTs or DHMTs or both) and the depth of information to be recorded and who is  
35 synthesising all collected data has proved to be challenging. Our response to this  
36 challenge is to be guided by the DHMT preferences in relation to the format of a diary,  
37 ensure the link with existing planning and decision processes within the districts and  
38 utilise CRTs-DHMT visits to support and encourage reflection by the DHMTs on the  
39 processes.  
40  
41  
42  
43  
44  
45  
46  
47  
48  
49  
50  
51  
52  
53

54  
55 Despite the above challenges, the research team has found the DHMTs to be enthusiastic  
56 about their work and dedicated to the project and its AR approach. This positive attitude is  
57  
58  
59  
60

1  
2  
3 an important catalyst in projects like this one where there is little financial incentive for the  
4 DHMTs to participate in the project. Also, there is also a growing level of collaboration  
5 across the participating districts in each country – and collaboration and sharing of  
6 experiences and research skills across the countries through the research partners.  
7  
8  
9

### 10 **Conclusion**

11  
12 This paper presents the methodology for the PERFORM project, an action research based  
13 study being undertaken in three African countries. We share five broad challenges  
14 encountered in, and the corresponding lessons learnt from, the development of the  
15 methodology: dealing with the changing context in each study site, competing priorities of  
16 the DHMTs, the complexity of this multi-site study, facilitating and recording learning and  
17 processes during the project and the ethical issues.  
18  
19

20 The dissemination of this research protocol is intended to generate interest in the PERFORM  
21 project and more importantly stimulate discussion on the use of action research in complex  
22 studies such as this project on strengthening district health management to improve health  
23 workforce performance.  
24  
25  
26  
27  
28  
29  
30  
31

### 32 **Acknowledgements**

33 This document is an output from the PERFORM project: improving health workforce  
34 performance in Ghana, Tanzania and Uganda, funded by the European Commission. The  
35 project involved a consortium of six partners: Liverpool School of Tropical Medicine,  
36 University of Leeds, University of Ghana, Swiss Tropical and Public Health Institute, Institute  
37 of Development Studies, University of Dar-es-salaam, School of Public Health, Makerere  
38 University.  
39  
40  
41  
42  
43  
44  
45  
46  
47

### 48 **Competing interests**

49 The authors declare that they have no competing interests  
50  
51  
52

### 53 **Authors' contributions**

54 RH, TM, MA, SB, PK and TMa are principal investigators on the grant and made substantial  
55 contributions to the conception and design of the project. CM wrote the first draft of the  
56  
57  
58  
59  
60

1  
2  
3 present manuscript and updated further drafts based on feedback from the co-authors. All  
4 authors reviewed and commented on the first and subsequent drafts of the manuscript. All  
5 authors read and approved the final manuscript.  
6  
7

### 8 **Funding statement**

9  
10 This study is funded by the European Commission Seventh Framework programme (FP7  
11 Theme Health: 2010.3.4-1, grant agreement number 266334).  
12  
13

### 14 **Figure legends:**

15  
16  
17  
18 Figure 1: Action research cycle

19  
20 Figure 1: Overview of the research concept

21  
22  
23  
24 Figure 3: Project timeline  
25  
26  
27  
28  
29  
30  
31  
32  
33  
34  
35  
36  
37  
38  
39  
40  
41  
42  
43  
44  
45  
46  
47  
48  
49  
50  
51  
52  
53  
54  
55  
56  
57  
58  
59  
60

## References

1. Travis P, Bennett S, Haines A, et al. Overcoming health-systems constraints to achieve the Millennium Development Goals. *Lancet*.2004; **364**:900-906.
2. The Task Force on Health Systems Research. The Millennium Development Goals will not be attained without new research addressing health system constraints to delivering effective interventions: World Health Organization 2005.
3. The United States President's Emergency Plan for AIDS Relief. Health system strengthening. USA.gov; [cited 2013 14/03/2013]; Available from: <http://www.pepfar.gov/about/138338.htm>.
4. Africa Japan Forum, Health Workforce Advocacy Initiative. The Role of the United States and Japan on Human Resources for Health in Developing Countries: An independent Policy Review from The Civil Society of the United States and Japan 2011.
5. Marchal B, Denerville E, Dedzo M, et al. Decentralisation, decision spaces and human resource management at hospital level: High commitment human resource management approaches used by the management team of Ghana's Cape Coast Central Regional Hospital Institute of Tropical Medicine, Antwerp 2005.
6. World Health Organization. World Health Report 2006: Working together for health. Geneva: World Health Organization 2006.
7. Vujicic M, Ohiri K, S S. Working in Health : Financing and Managing the Public Sector Health Workforce. Washington, DC 2009.

- 1  
2  
3 8. World Health Organization. Everybody's business: Strengthening health systems to  
4  
5 improve health outcomes - WHO's framework for action. Geneva 2007.  
6  
7
- 8  
9 9. de Savigny D, T A. Systems thinking for health systems strengthening. Geneva, Research  
10  
11 AfHPaS; 2009.  
12
- 13  
14 10. Agyepong IA, Kodua A, Adjei S, et al. When 'solutions of yesterday become problems of  
15  
16 today': crisis-ridden decision making in a complex adaptive system (CAS)—the Additional  
17  
18 Duty Hours Allowance in Ghana. . Health Policy Plann.2012; **27**:iv20–iv31.  
19  
20
- 21  
22 11. Adam T, Hsu J, de Savigny D, et al. Evaluating health systems strengthening  
23  
24 interventions in low-income and middle-income countries: are we asking the right  
25  
26 questions? . Health Policy Plann.2012; **27** iv9-iv19.  
27  
28
- 29  
30 12. Pawson R, Greenhalgh T, Harvey G, et al. Realist synthesis: an introduction. Research  
31  
32 methods. Manchester: ESRC Research Methods Programme 2004 Contract No.: 2.  
33  
34
- 35  
36 13. Dieleman M, Gerretsen B, van der Wilt G: Human resource management interventions  
37  
38 to improve health workers' performance in low and middle income countries: a realist  
39  
40 review. Health Res Policy Syst.2009; **7**:7.  
41  
42
- 43  
44 14. Rowe AK, de Savigny D, Lanata CF, et al. How can we achieve and maintain high-quality  
45  
46 performance of health workers in low-resource settings? Lancet.2005; **366**:1026-1035.  
47  
48
- 49  
50 15. Macduffie JP: Human resource bundles and manufacturing performance: organisational  
51  
52 logic and flexible production systems in the world auto industry. Ind Labor Relat Rev.1995;  
53  
54 **48**:197-221.  
55  
56  
57  
58  
59  
60

- 1  
2  
3 16. e Cunha RC, e Cunha MP: Impact of strategy, strength of the HRM system and HRM  
4  
5 bundles on organizational performance. Problems and Perspectives in Management.2009;  
6  
7 **7**:57-69.  
8  
9
- 10  
11 17. Buchan J: What difference does ("good") HRM make? Human Resources for  
12  
13 Health.2004; **2**:6.  
14
- 15  
16  
17 18. Bossert TJ, Beauvais JC: Decentralization of health systems in Ghana, Zambia, Uganda  
18  
19 and the Philippines: a comparative analysis of decision space. Health Policy Plann.2002;  
20  
21 **17**:14-31.  
22
- 23  
24  
25 19. Loewenson R, Flores W, Shukla A, et al. Raising the profile of participatory action  
26  
27 research at the 2010 Global Symposium on Health Systems Research. MEDICC Review.2011;  
28  
29 **13**:35-38.  
30
- 31  
32  
33 20. Reason P, Bradbury H Handbook of Action Research: Participative Inquiry and Practice. 2nd ed.  
34  
35 London: Sage; 2001.  
36
- 37  
38  
39 21. Argyris C, Schön D Organizational Learning: A theory of action perspective. Reading MA:  
40  
41 Addison-Wesley; 1978.  
42
- 43  
44 22. Lewin K. Group Decisions and Social Change. In: Maccoby EE, Newcomb TM, Hartley  
45  
46 El, editors. Readings in Social Psychology. New York: Holt, Rhinehart and Winston; 1958. p.  
47  
48 197 - 211.  
49
- 50  
51  
52 23. Hart E, Bond M, editors. Action Research for Health Social Care: a Guide to Practice.  
53  
54 Buckingham: Open University Press; 1995.  
55  
56  
57  
58  
59  
60

1  
2  
3  
4  
5  
6  
7  
8  
9  
10  
11  
12  
13  
14  
15  
16  
17  
18  
19  
20  
21  
22  
23  
24  
25  
26  
27  
28  
29  
30  
31  
32  
33  
34  
35  
36  
37  
38  
39  
40  
41  
42  
43  
44  
45  
46  
47  
48  
49  
50  
51  
52  
53  
54  
55  
56  
57  
58  
59  
60

For peer review only



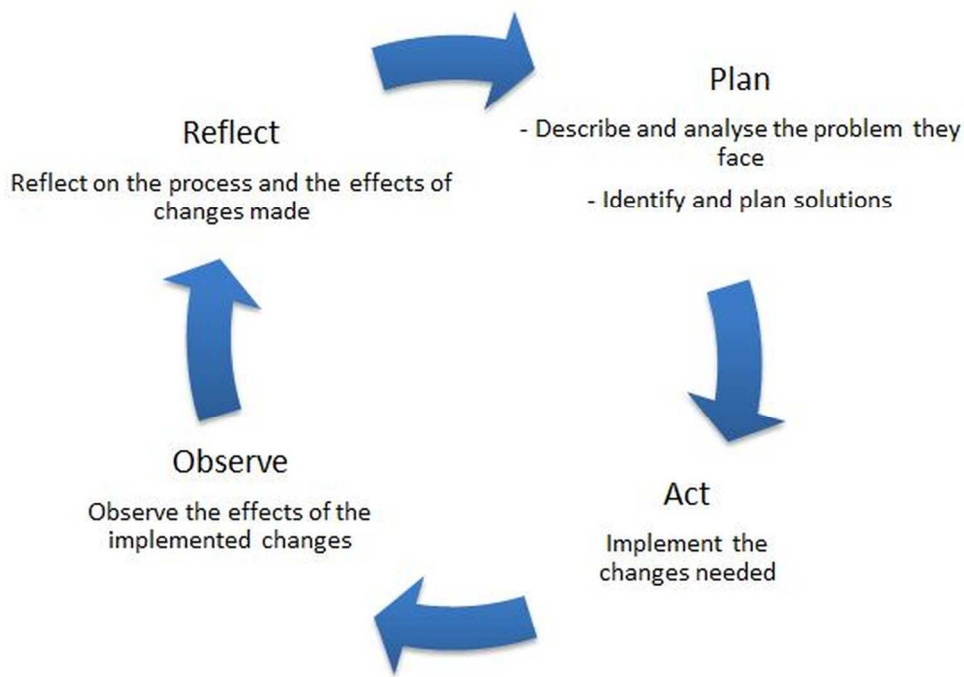

Figure 1: Action Research Cycle[20]

122x90mm (300 x 300 DPI)

Review only

1  
2  
3  
4  
5  
6  
7  
8  
9  
10  
11  
12  
13  
14  
15  
16  
17  
18  
19  
20  
21  
22  
23  
24  
25  
26  
27  
28  
29  
30  
31  
32  
33  
34  
35  
36  
37  
38  
39  
40  
41  
42  
43  
44  
45  
46  
47  
48  
49  
50  
51  
52  
53  
54  
55  
56  
57  
58  
59  
60

1  
2  
3  
4  
5  
6  
7  
8  
9  
10  
11  
12  
13  
14  
15  
16  
17  
18  
19  
20  
21  
22  
23  
24  
25  
26  
27  
28  
29  
30  
31  
32  
33  
34  
35  
36  
37  
38  
39  
40  
41  
42  
43  
44  
45  
46  
47  
48  
49  
50  
51  
52  
53  
54  
55  
56  
57  
58  
59  
60

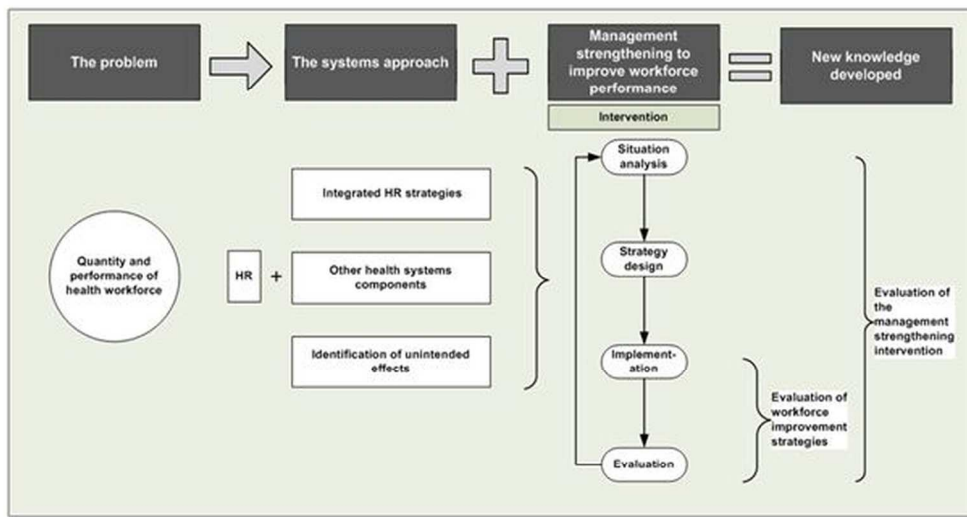

Figure 2: Overview of the research concept

160x90mm (300 x 300 DPI)

review only

1  
2  
3  
4  
5  
6  
7  
8  
9  
10  
11  
12  
13  
14  
15  
16  
17  
18  
19  
20  
21  
22  
23  
24  
25  
26  
27  
28  
29  
30  
31  
32  
33  
34  
35  
36  
37  
38  
39  
40  
41  
42  
43  
44  
45  
46  
47  
48  
49  
50  
51  
52  
53  
54  
55  
56  
57  
58  
59  
60

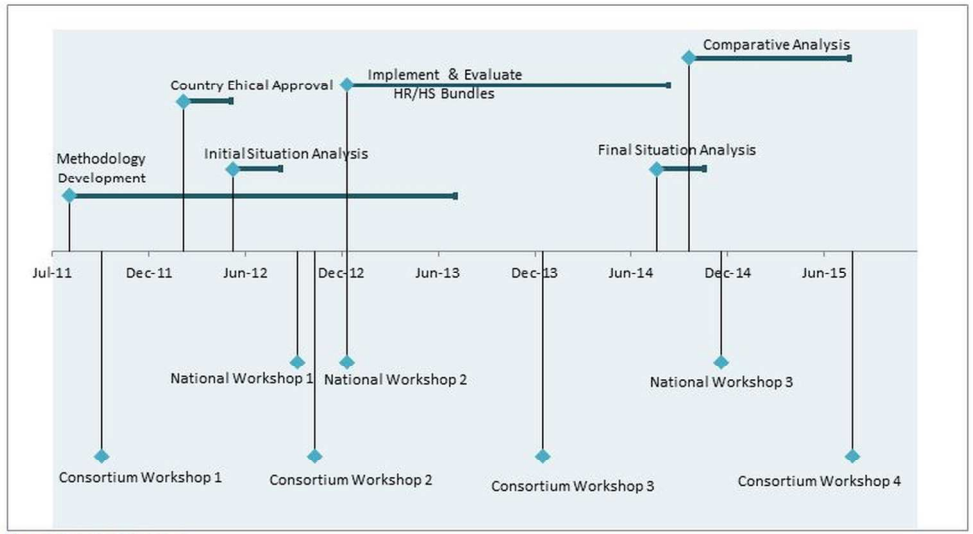

Figure 3: Project timeline

159x90mm (300 x 300 DPI)

review only
